# Supplementary material for: Genome-Wide Identification of Aquaporin Gene Family in Pitaya Reveals an HuNIP6;1 Involved in Flowering Process
Source: MDPI journal article supplement (doi:10.3390/ijms22147689), 2021-07-19
Supplement: s1 [file s1]

## Supplementary Table S1

### Primers of genes for qRT-PCR

| Gene names      | Forward primer (5'-3') | Reverse primer (5'-3')      |
|-----------------|------------------------|-----------------------------|
| <i>HuPIP1;1</i> | AAACCCAGCAGTGACCTTTG   | CCACCCAACACTTCATAGGG        |
| <i>HuPIP1;2</i> | CATGGTAATGCAGTGCTTGG   | ACGAAGGTGCCAACAATCTC        |
| <i>HuPIP1;3</i> | ACACTGTCTTCTCCGCCACT   | GACTCCTGGCTGGGTTGATA        |
| <i>HuPIP1;4</i> | GCACATAAACCCAGCAGTGA   | CTCCACCACCCAACATCTG         |
| <i>HuPIP1;5</i> | GAGATTGTGGGCACCTTTGT   | ATAGGGATGGTTGCCAAGTG        |
| <i>HuPIP2;1</i> | TCTAAGGAGGTGAGCGAGGA   | ATGAACTCGGCAATGAGAGC        |
| <i>HuPIP2;2</i> | CACCCTCATGGGAAGGACTA   | GGCGATGGTAACGTAGAGGA        |
| <i>HuPIP2;3</i> | GCACATAAACCCAGCAGTGA   | CCATAGCGGTCGTAGTAGGC        |
| <i>HuPIP2;4</i> | GTGACATTCCGGGCTGTTCTT  | CCTCCGCCGTACCTATTGTA        |
| <i>HuPIP2;5</i> | GCATCAACCCTGCTCGTAGT   | CCTTGACAAAGCTGGCTCTC        |
| <i>HuTIP1;1</i> | ACTGGTGGCTTGGAACATC    | TTGGCTCCGACAATGAAAC         |
| <i>HuTIP1;2</i> | TTGACCCAAAGAAAGGCAAC   | CCGAGCCAATAGACCCAGT         |
| <i>HuTIP1;3</i> | GGCTGAGTTCATTTCATGC    | TGAGACAGCCACAAACAAGG        |
| <i>HuTIP1;4</i> | GGCTGAGTTCATTTCATGC    | TGAGACAGCCACAAACAAGG        |
| <i>HuTIP2;1</i> | TGCTTGCCTTCTCCTCAAAT   | TGTGCCCTTCTTAGGGTCAG        |
| <i>HuTIP2;2</i> | TGCTTGCCTTCTCCTCAAAT   | TGTGCCCTTCTTAGGGTCAG        |
| <i>HuTIP2;3</i> | TGCTGGTGTAGGATCTGCTG   | AGCTGGGTTCAAATGTCCAC        |
| <i>HuTIP2;4</i> | GTCTCCGTGGGTGCTAACAT   | AAGGAAACAAGCGACAATGG        |
| <i>HuTIP2;5</i> | GCTGGTAGGAGTGGCAGTGT   | AGACGCCAGTTAGGATGGTG        |
| <i>HuTIP3;1</i> | ATGGCGCCGCCTCGGAGATA   | TTAGTAATCTTCTGGTGCCAAAGGTTG |
| <i>HuTIP4;1</i> | CAAAGAAAGGCCCACTTCAA   | GATCCAGTGATCGGTCCAGT        |
| <i>HuTIP4;2</i> | CAAAGAAAGGCCCACTTCAA   | AGATCCAGTGATCGGTCCAG        |
| <i>HuTIP5;1</i> | TGGCCTCGGCTGTCTATATC   | GAGGCAAGCCATAACAGAGC        |
| <i>HuNIP4;1</i> | TGATATTTGCAGGGTGTGGA   | ACAGCAGGGTTGAAATGAGC        |
| <i>HuNIP4;2</i> | CAATGAACCCAGCAAGGAGT   | AGTTTGGATGGCAACTGGTC        |
| <i>HuNIP4;3</i> | GCTCAGTGGTGGTGAACAAG   | AAGAGTAACGGCAGGGTTGA        |
| <i>HuNIP4;4</i> | ATTTCCCTTGGAAGCAGGTT   | GCTTGAACATCTGTGCCTGA        |
| <i>HuNIP5;1</i> | TTTCATGTCAGGCGGTGTAA   | CTCCCACTGCAATACCTGCT        |
| <i>HuNIP6;1</i> | TTTGGAGGATTTAGCGGAGA   | TAGAGGGACAGAGGGAGGTG        |
| <i>HuNIP6;2</i> | ATCCGGTGAGGACACTAGGA   | GACAGCATTGTGGATGTTGG        |
| <i>HuNIP7;1</i> | TGCTCGCAACATTTATGGTC   | GATTCAACGACCCTCCAGAA        |
| <i>HuSIP1;1</i> | AGCCATCTTAGAAGCGATGC   | AGCTCGAATCCTGTGGGTAA        |
| <i>HuSIP1;2</i> | TGGCAGTCCTTGTCATCATC   | ACATAAGCCCATCCAAATGC        |
| <i>Actin(1)</i> | AAAGGCTAACAGGGAGAAAA   | GACCACTGGCGTAAAGAGAA        |
| <i>JMJ30</i>    | GTATGCTTCTCCGCAAGGA    | CGGGACCAATCTCTCACCT         |
| <i>COL9</i>     | AGCAGCATAAGAGGCAAACC   | CTTGTCGGTAGGACCATCATC       |
| <i>PRR5</i>     | GCCAAAGAGAGGTGACTAATGG | TCGGAGGTGAGGGTTGCTA         |
